# Supplementary material
Source: ML conference proceedings conference paper supplement (https://proceedings.neurips.cc/paper_files/paper/2014/hash/7fe1f8abaad094e0b5cb1b01d712f708-Abstract.html)
Supplement: Supplementary file [file 7fe1f8abaad094e0b5cb1b01d712f708-Supplemental.zip]

---

# Supplement to: PAC-Bayesian AUC classification and scoring

---

**James Ridgway\***

CREST and CEREMADE University Dauphine  
Timbre J120  
3, Avenue Pierre Larousse 92245 MALAKOFF CEDEX  
FRANCE  
james.ridgway@ensae.fr

**Pierre Alquier**

University College Dublin  
Address  
pierre.alquier@ucd.ie

**Nicolas Chopin**

CREST(ENSAE) and HEC Paris  
Timbre J120  
3, Avenue Pierre Larousse 92245 MALAKOFF CEDEX  
FRANCE  
nicolas.chopin@ensae.fr

**Feng Liang**

University of Illinois at Urbana-Champaign  
116A Illini Hall 725 S. Wright St. Champaign, IL 61820 USA

## Abstract

This supplement follows the same plan as the paper.

## 2 PAC-Bayes bounds for linear scores

### 2.2 Assumptions and general results

A simple sufficient condition for  $\text{Dens}(c)$  to hold is that  $(X_1 - X_2)/\|X_1 - X_2\|$  admits a probability density with respect to the spherical measure of dimension  $d-1$  which is bounded above by  $B$ . Then

$$\begin{aligned}\mathbb{P}(\langle X_1 - X_2, \theta \rangle \geq 0, \langle X_1 - X_2, \theta' \rangle \leq 0) &\leq B \frac{\arccos(\langle \theta, \theta' \rangle)}{2\pi} \\ &\leq \frac{B}{2\pi} \sqrt{5 - 5 \langle \theta, \theta' \rangle} \\ &= \frac{B}{2\pi} \sqrt{\frac{5}{2}} \|\theta - \theta'\|.\end{aligned}$$

### Proof of lemma 2.1

In order to prove lemma 2.1 we need the following Bernstein inequality.

**Proposition 2.1 (Bernstein's inequality for U-statistics)** *For any  $\gamma > 0$ , for any  $\theta \in \mathbb{R}^d$ ,*

$$\mathbb{E} \exp[\gamma |R_n(\theta) - \bar{R}_n - R(\theta) + \bar{R}|] \leq 2 \exp \left[ \frac{\frac{\gamma^2}{n-1} \mathbb{E}((q_{1,2}^\theta)^2)}{\left(1 - \frac{4\gamma}{n-1}\right)} \right].$$

---

\*<http://www.crest.fr/pagesperso.php?user=3328>

*Proof of Proposition 2.1.* Fix  $\theta$ . Remember that

$$q_{i,j}^\theta = \mathbf{1}\{\langle \theta, X_i - X_j \rangle (Y_i - Y_j) < 0\} - \mathbf{1}\{[\sigma(X_i) - \sigma(X_j)](Y_i - Y_j) < 0\} - R(\theta) + \bar{R}$$

so that

$$U_n := R_n(\theta) - \bar{R}_n - R(\theta) + \bar{R} = \frac{1}{n(n-1)} \sum_{i \neq j} q_{i,j}^\theta.$$

First, note that

$$\mathbb{E} \exp[\gamma |U_n|] \leq \mathbb{E} \exp[\gamma U_n] + \mathbb{E} \exp[\gamma (-U_n)].$$

We will only upper bound the first term in the r.h.s., as the upper bound for the second term may be obtained exactly in the same way (just replace  $q_{i,j}^\theta$  by  $-q_{i,j}^\theta$ ). Now, use Hoeffding's decomposition Hoeffding [1948]: this is the technique used by Hoeffding to prove inequalities on U-statistics. Hoeffding proved that

$$U_n = \frac{1}{n!} \sum_{\pi} \frac{1}{\lfloor \frac{n}{2} \rfloor} \sum_{i=1}^{\lfloor \frac{n}{2} \rfloor} q_{\pi(i), \pi(i + \lfloor \frac{n}{2} \rfloor)}^\theta$$

where the sum is taken over all the permutations  $\pi$  of  $\{1, \dots, n\}$ . Jensen's inequality leads to

$$\begin{aligned} \mathbb{E} \exp[\gamma U_n] &= \mathbb{E} \exp \left[ \gamma \frac{1}{n!} \sum_{\pi} \frac{1}{\lfloor \frac{n}{2} \rfloor} \sum_{i=1}^{\lfloor \frac{n}{2} \rfloor} q_{\pi(i), \pi(i + \lfloor \frac{n}{2} \rfloor)}^\theta \right] \\ &\leq \frac{1}{n!} \sum_{\pi} \mathbb{E} \exp \left[ \frac{\gamma}{\lfloor \frac{n}{2} \rfloor} \sum_{i=1}^{\lfloor \frac{n}{2} \rfloor} q_{\pi(i), \pi(i + \lfloor \frac{n}{2} \rfloor)}^\theta \right]. \end{aligned}$$

We now use, for each of the terms in the sum, Massart's version of Bernstein's inequality Massart [2007] (ineq. (2.21) in Chapter 2, the assumption is checked by  $q_{\pi(i), \pi(i + \lfloor \frac{n}{2} \rfloor)}^\theta \in [-2, 2]$  so  $\mathbb{E}((q_{\pi(i), \pi(i + \lfloor \frac{n}{2} \rfloor)}^\theta)^k) \leq \mathbb{E}((q_{\pi(i), \pi(i + \lfloor \frac{n}{2} \rfloor)}^\theta)^2) 2^{k-2}$ ). We obtain:

$$\mathbb{E} \exp \left[ \frac{\gamma}{\lfloor \frac{n}{2} \rfloor} \sum_{i=1}^{\lfloor \frac{n}{2} \rfloor} q_{\pi(i), \pi(i + \lfloor \frac{n}{2} \rfloor)}^\theta \right] \leq \exp \left[ \frac{\mathbb{E}((q_{\pi(1), \pi(1 + \lfloor \frac{n}{2} \rfloor)}^\theta)^2) \frac{\gamma^2}{\lfloor \frac{n}{2} \rfloor}}{2 \left(1 - 2 \frac{\gamma}{\lfloor \frac{n}{2} \rfloor}\right)} \right].$$

First, note that we have the inequality  $\lfloor \frac{n}{2} \rfloor \geq (n-1)/2$ . Then, remark that as the pairs  $(X_i, Y_i)$  are iid, we have  $\mathbb{E}((q_{\pi(1), \pi(1 + \lfloor \frac{n}{2} \rfloor)}^\theta)^2) = \mathbb{E}((q_{1,2}^\theta)^2)$  so we have a simpler inequality

$$\mathbb{E} \exp \left[ \frac{\gamma}{\lfloor \frac{n}{2} \rfloor} \sum_{i=1}^{\lfloor \frac{n}{2} \rfloor} q_{\pi(i), \pi(i + \lfloor \frac{n}{2} \rfloor)}^\theta \right] \leq \exp \left[ \frac{\mathbb{E}((q_{1,2}^\theta)^2) \frac{\gamma^2}{n-1}}{\left(1 - \frac{4\gamma}{n-1}\right)} \right].$$

This ends the proof of the proposition.  $\square$

The following proposition is also of use in the proof of lemma 2.1.

**Proposition 2.2** *For any measure  $\rho \in \mathcal{M}_+^1(\Theta)$  and any measurable function  $h : \theta \rightarrow \mathbb{R}$  such that  $\int \exp(h(\theta)) \pi(d\theta) < \infty$ , we have*

$$\log \left( \int \exp(h(\theta)) \pi(d\theta) \right) = \sup_{\rho \in \mathcal{M}_+^1} \left( \int h(\theta) \rho(d\theta) - \mathcal{K}(\rho, \pi) \right).$$

*In addition if  $h$  is bounded by above on the support of  $\pi$  the supremum is reached for the Gibbs distribution,*

$$\rho(d\theta) \propto \exp(h(\theta)) \pi(d\theta).$$

**Proof:** e.g. Catoni [2007].  $\square$

**Proof of Lemma 2.1** From the proof of Proposition 2.1, and using the short-hand  $q_\theta$  for  $q_{1,2}^\theta$ , we deduce

$$\mathbb{E} \left[ \exp \{ \rho (\gamma(R_n(\theta) - \bar{R}_n - R(\theta) + \bar{R})) + \eta(\theta) \} \right] \leq \exp \left( \frac{\gamma^2}{n-1} \frac{\rho(\mathbb{E}q_\theta^2)}{(1 - \frac{4\gamma}{n-1})} + \rho(\eta(\theta)) \right). \quad (1)$$

Using proposition 2.2, and the fact that  $e^x \geq \mathbb{1}\{x \geq 0\}$  we have that

$$\begin{aligned} & \mathbb{P} \left\{ \sup_{\rho \in \mathcal{M}_+^1(\Theta)} \rho (\gamma(R_n(\theta) - \bar{R}_n - R(\theta) + \bar{R}) - \eta(\theta)) - \mathcal{K}(\rho, \pi) \geq 0 \right\} \\ & \leq \mathbb{E} \left( \pi \{ \exp \{ \rho (\gamma(R_n(\theta) - \bar{R}_n - R(\theta) + \bar{R}) - \eta(\theta)) \} \} \right) \\ & = \pi \left( \mathbb{E} \{ \exp \{ \rho (\gamma(R_n(\theta) - \bar{R}_n - R(\theta) + \bar{R}) - \eta(\theta)) \} \} \right) \quad , \text{ by Fubini} \\ & \leq \pi \left\{ \exp \left( \frac{\gamma^2 \rho(\mathbb{E}q_\theta^2)}{(n-1)(1 - \frac{4\gamma}{n-1})} - \rho(\eta(\theta)) \right) \right\} \quad , \text{ using (1).} \end{aligned}$$

In the following we take  $\eta(\theta) = \log \frac{1}{\epsilon} + \frac{\gamma^2}{n-1} \frac{\rho(\mathbb{E}q_\theta^2)}{(1 - \frac{4\gamma}{n-1})}$  leading to the following result with probability at least  $1 - \epsilon$ ,  $\forall \rho \in \mathcal{M}_+^1(\Theta)$ :

$$\rho(R_n(\theta)) - \bar{R}_n \leq \rho(R(\theta)) - \bar{R} + \frac{\mathcal{K}(\rho, \pi) + \log \frac{1}{\epsilon}}{\gamma} + \frac{\gamma}{n-1} \frac{\rho(\mathbb{E}q_\theta^2)}{(1 - \frac{4\gamma}{n-1})}. \quad (2)$$

Under **MA**(1,  $C$ ) we can write:

$$\rho(R_n(\theta)) - \bar{R}_n \leq \left( 1 + \frac{\gamma C}{n-1} \frac{1}{(1 - \frac{4}{n-1})} \right) (\rho(R(\theta)) - \bar{R}) + \frac{\mathcal{K}(\rho, \pi) + \log \frac{1}{\epsilon}}{\gamma}.$$

Using Bernstein's inequality in the symmetric case, with probability  $1 - \epsilon$  we can assert that:

$$\left( 1 - \frac{\gamma C}{n-1} \frac{1}{(1 - \frac{4}{n-1})} \right) (\rho(R(\theta)) - \bar{R}) \leq \rho(R_n(\theta)) - \bar{R}_n + \frac{\mathcal{K}(\rho, \pi) + \log \frac{1}{\epsilon}}{\gamma}.$$

The latter is true in particular for  $\rho = \pi(\theta|\mathcal{S})$ , the Gibbs posterior:

$$\left( 1 - \frac{\gamma C}{n-1} \frac{1}{(1 - \frac{4}{n-1})} \right) \left( \int_{\Theta} R(\theta) \pi_\gamma(d\theta|\mathcal{D}) - \bar{R} \right) \leq \inf_{\rho \in \mathcal{M}_+^1} \left\{ \rho(R_n(\theta)) - \bar{R}_n + \frac{\mathcal{K}(\rho, \pi) + \log \frac{1}{\epsilon}}{\gamma} \right\}.$$

Making use of equation (2) and the fact that  $\gamma \leq (n-1)/8C$  we have with probability  $1 - 2\epsilon$ :

$$\left( \int_{\Theta} R_n(\theta) \pi_\gamma(d\theta|\mathcal{D}) - \bar{R}_n \right) \leq 2 \inf_{\rho \in \mathcal{M}_+^1} \left( \rho(R(\theta)) - \bar{R} + 2 \frac{\mathcal{K}(\rho, \pi) + \log \frac{1}{\epsilon}}{\gamma} \right). \quad \square$$

Lemma 2.1 gives some approximately correct finite sample bound under hypothesis **MA**(1,  $C$ ). It is easy to extend those results to the more general case of **MA**( $\infty$ ,  $C$ ). Note in particular that this assumption is always satisfied for  $C = 4$ .

**Proof of Lemma 2.2** First consider in our case that, the margin assumption is always true for  $C = 4$ ,  $\mathbb{E}(q_\theta^2) \leq 4$ , the rest of the proof is similar to that of lemma 2.1. From equation (2) with the above hypothesis:

$$\rho(R_n(\theta)) - \bar{R}_n \leq \rho(R(\theta)) - \bar{R} + \frac{\mathcal{K}(\rho, \pi) + \log \frac{1}{\epsilon}}{\gamma} + \frac{\gamma}{n-1} \frac{4}{(1 - \frac{4}{n-1})}$$

From the Bernstein inequality with in the symmetric case we get with probability  $1 - \epsilon$ :

$$\rho(R(\theta)) - \bar{R} \leq \rho(R_n(\theta)) - \bar{R}_n + \frac{\mathcal{K}(\rho, \pi) + \log \frac{1}{\epsilon}}{\gamma} + \frac{\gamma}{n-1} \frac{4}{(1 - \frac{4}{n-1})}$$

We get, after noting that the Gibbs posterior can be written as an infimum (Legendre transform), with probability  $1 - 2\epsilon$ :

$$\int (R(\theta)\pi_\gamma(d\theta|\mathcal{D}) - \bar{R} \leq \inf_{\rho \in \mathcal{M}_+^1(\Theta)} \rho(R(\theta)) - \bar{R} + 2 \frac{\mathcal{K}(\rho, \pi) + \log \frac{1}{\epsilon}}{\gamma} + \frac{16\gamma}{n-1}$$

(we also used  $\gamma \leq (n-1)/8$ ).

□

The two above lemma depend on some class complexity  $\mathcal{K}(\rho, \pi)$ . The latter can be specialized to different choice of prior measure  $\pi$ . In the following we propose two specifications to a Gaussian prior and a spike and slab prior.

### 2.3 Independent Gaussian Prior

**Theorem 2.3** Assume **MA**(1,  $C$ ),  $C \geq 1$ , **Dens**( $c$ ),  $c > 0$ , and take  $\vartheta = \frac{2}{d}(1 + \frac{1}{n^2d})$ ,  $\gamma = (n-1)/8C$ , then there exists a constant  $\alpha = \alpha(c, C, d)$  such that for any  $\epsilon > 0$ , with probability  $1 - \epsilon$ ,

$$\int R(\theta)\pi_\gamma(\theta|\mathcal{D})d\theta - \bar{R} \leq 2 \inf_{\theta_0} \left( R(\theta_0) - \bar{R} + \alpha \frac{d \log(n) + \log \frac{4}{\epsilon}}{n-1} \right).$$

**Proof:** For any  $\theta_0 \in \mathbb{R}^p$  with  $\|\theta_0\| = 1$  and  $\delta > 0$  we put

$$\rho_{\theta_0, \delta}(d\theta) \propto \mathbf{1}_{\|\theta - \theta_0\| \leq \delta} \pi(d\theta).$$

Then we have, from Lemma 2.1, with probability at least  $1 - \epsilon$ ,

$$\int R(\theta)\pi_\gamma(d\theta|\mathcal{D}) - \bar{R} \leq 2 \inf_{\theta_0, \delta} \left\{ \int R(\theta)\rho_{\theta_0, \delta}(d\theta) - \bar{R} + 16C \frac{\mathcal{K}(\rho_{\theta_0, \delta}, \pi) + \log \left( \frac{4}{\epsilon} \right)}{(n-1)} \right\}$$

First, note that

$$\begin{aligned} R(\theta) &= \mathbb{E}(\mathbf{1}\{\langle \theta, X - X' \rangle (Y - Y') < 0\}) \\ &= \mathbb{E}(\mathbf{1}\{\langle \theta_0, X - X' \rangle (Y - Y') < 0\}) \\ &\quad + \mathbb{E}(\mathbf{1}\{\langle \theta, X - X' \rangle (Y - Y') < 0\} - \mathbf{1}\{\langle \theta_0, X - X' \rangle (Y - Y') < 0\}) \\ &\leq \mathbb{R}(\theta_0) + \mathbb{P}(\text{sign}\langle \theta, X - X' \rangle (Y - Y') \neq \text{sign}\langle \theta_0, X - X' \rangle (Y - Y')) \\ &= \mathbb{R}(\theta_0) + \mathbb{P}(\text{sign}\langle \theta, X - X' \rangle \neq \text{sign}\langle \theta_0, X - X' \rangle) \\ &\leq \mathbb{R}(\theta_0) + c \left\| \frac{\theta}{\|\theta\|} - \theta_0 \right\| \\ &\leq \mathbb{R}(\theta_0) + 2c\|\theta - \theta_0\|. \end{aligned}$$

As a consequence  $\int R(\theta)\rho_{\theta_0, \delta}(d\theta) \leq \mathbb{R}(\theta_0) + 2c\delta$ .

The next step is to calculate  $\mathcal{K}(\rho_{\theta_0, \delta}, \pi)$ . We have

$$\mathcal{K}(\rho_{\theta_0, \delta}, \pi) = \log \frac{1}{\pi(\{\theta : \|\theta - \theta_0\| \leq \delta\})}.$$

Assuming that  $\theta_{0,1} > 0$  (the proof is exactly symmetric in the other case)

$$\begin{aligned}
-\mathcal{K}(\rho_{\theta_0,\delta}, \pi) &= \log \pi \left( \left\{ \theta : \sum_{i=1}^d (\theta_i - \theta_{0,i})^2 \leq \delta^2 \right\} \right) \\
&\geq d \log \pi \left( \left\{ \theta : (\theta_1 - \theta_{0,1})^2 \leq \frac{\delta^2}{d} \right\} \right) \\
&\geq d \log \int_{\frac{\theta_{0,1}}{\sqrt{\vartheta}} - \frac{\delta}{\sqrt{\vartheta d}}}^{\frac{\theta_{0,1}}{\sqrt{\vartheta}} + \frac{\delta}{\sqrt{\vartheta d}}} \varphi_{(0,1)}(x) dx \\
&\geq d \log \left( \frac{\delta}{2\sqrt{\vartheta d}} \varphi \left( \frac{\theta_{0,1}}{\sqrt{\vartheta}} + \frac{\delta}{\sqrt{\vartheta d}} \right) \right) \\
&\geq d \log \left( \frac{\delta}{2\sqrt{\vartheta d}} \varphi \left( \frac{1}{\sqrt{\vartheta}} + \frac{\delta}{\sqrt{\vartheta d}} \right) \right) \\
&= d \log \left( \frac{\delta}{2\sqrt{2\pi\vartheta d}} \exp \left[ -\frac{1}{2} \left( \frac{1}{\sqrt{\vartheta}} + \frac{\delta}{\sqrt{\vartheta d}} \right)^2 \right] \right) \\
&\geq d \log \left\{ \frac{\delta}{2\sqrt{2\pi\vartheta d}} \exp \left( -\frac{1}{\vartheta} - \frac{\delta^2}{\vartheta d} \right) \right\}
\end{aligned}$$

$$\mathcal{K}(\rho_{\theta_0,\delta}, \pi) \leq -d \log\{\delta\} + \frac{d}{2} \log\{8\pi\vartheta d\} + \frac{1}{\vartheta} + \frac{\delta^2}{\vartheta d}$$

And we can plug the equation above in the result of lemma 2.1 with  $\delta = \frac{1}{n}$

$$\int R(\theta) \pi_\gamma(\theta|\mathcal{D}) - \bar{R} \leq 2 \inf_{\theta_0} \left( R(\theta_0) - \bar{R} + 2c \frac{1}{n} + \frac{2}{\gamma} \left( d \log\{n\} + \frac{d}{2} \log\{8\pi\vartheta d\} + \frac{1}{\vartheta} + \frac{\frac{1}{n^2}}{\vartheta d} + \log \frac{4}{\epsilon} \right) \right)$$

Any  $\gamma = O(n)$  will lead to a convergence result. Taking  $\gamma = (n-1)/8C$  and optimizing in  $\vartheta$  we obtain a variance of  $\vartheta = \frac{2(1+\frac{1}{n^2d})}{d}$ .  $\square$

As was done for the previous lemmas we can lift the  $\mathbf{MA}(\infty, C)$  and use the lemma 2.2 instead, this gives rise to the following theorem.

**Theorem 2.4** Assume  $\mathbf{MA}(\infty, C)$ ,  $C \geq 1$ ,  $\mathbf{Dens}(c)$   $c > 0$ , and take  $\vartheta = \frac{2}{d}(1 + \frac{1}{n^2d})$ ,  $\gamma = C\sqrt{dn \log(n)}$ , there exists a constant  $\alpha = \alpha(c, C, d)$  such that for any  $\epsilon > 0$ , with probability  $1 - \epsilon$ ,

$$\int R(\theta) \pi_\gamma(\theta|\mathcal{D}) d\theta - \bar{R} \leq \inf_{\theta_0} \left( R(\theta_0) - \bar{R} + \alpha \frac{\sqrt{d \log(n)} + \log \frac{2}{\epsilon}}{\sqrt{n}} \right).$$

**Proof:** Use Lemma 2.2 and the same steps as in the proof of Theorem 2.3, optimize w.r.t.  $\gamma$  and  $\vartheta$  to get the result.  $\square$

We show the same kind of result in the following but for spike and slab priors.

## 2.4 Spike and slab prior for feature selection

**Theorem 2.5** Assume  $\mathbf{MA}(1, C)$  holds with  $C \geq 1$ ,  $\mathbf{Dens}(c)$  holds with  $c > 0$ , and take  $p = 1 - \exp(-1/d)$  and  $v_0 \leq 1/(2nd \log(d))$ , and  $\gamma = (n-1)/(8C)$ . Then there is a constant  $\alpha = \alpha(C, v_1, c)$  such that for any  $\epsilon > 0$ , with probability at least  $1 - \epsilon$  on the drawing of the data  $\mathcal{D}$ ,

$$\int R(\theta) \pi_\gamma(d\theta|\mathcal{D}) - \bar{R} \leq 2 \inf_{\theta_0} \left\{ R(\theta_0) - \bar{R} + \alpha \frac{\|\theta_0\|_0 \log(nd) + \log \left( \frac{4}{\epsilon} \right)}{2(n-1)} \right\}.$$

**Proof:** As for the proof of theorem 2.3 we start by defining, for any  $\theta_0 \in \mathbb{R}^p$  with  $\|\theta_0\| = 1$  and  $\delta > 0$ ,

$$\rho_{\theta_0, \delta}(\mathrm{d}\theta) \propto \mathbf{1}_{\|\theta - \theta_0\| \leq \delta} \pi(\mathrm{d}\theta)$$

so that in the end, by a similar argument as previously it remains only to upper bound the following quantity,

$$\mathcal{K}(\rho_{\theta_0, \delta}, \pi) = \log \frac{1}{\pi(\{\theta : \|\theta - \theta_0\| \leq \delta\})}.$$

Let  $\pi_0$  denote the probability distribution such that the  $\theta_i$  are iid  $\mathcal{N}(0, v_0)$ . So:

$$\begin{aligned} -\mathcal{K}(\rho_{\theta_0, \delta}, \pi) &= \log \pi \left( \left\{ \theta : \sum_{i=1}^d (\theta_i - \theta_{0,i})^2 \leq \delta^2 \right\} \right) \\ &\geq \log \pi \left( \left\{ \theta : \forall i, (\theta_i - \theta_{0,i})^2 \leq \frac{\delta^2}{d} \right\} \right) \\ &= \sum_{i: \theta_{0,i} \neq 0} \log \pi \left( \left\{ (\theta_i - \theta_{0,i})^2 \leq \frac{\delta^2}{d} \right\} \right) \\ &\quad + \log \pi \left( \left\{ \forall i \text{ with } \theta_{0,i} = 0, \theta_i^2 < \frac{\delta^2}{d} \right\} \right) \\ &\geq \sum_{i: \theta_{0,i} \neq 0} \log \pi \left( \left\{ (\theta_i - \theta_{0,i})^2 \leq \frac{\delta^2}{d} \right\} \right) \\ &\quad + \log \pi_0 \left( \left\{ \forall i \text{ with } \theta_{0,i} = 0, \theta_i^2 < \frac{\delta^2}{d} \right\} \right) + d \log(1-p) \\ &= \sum_{i: \theta_{0,i} \neq 0} \log \pi \left( \left\{ (\theta_i - \theta_{0,i})^2 \leq \frac{\delta^2}{d} \right\} \right) \\ &\quad + \log \left[ 1 - \pi_0 \left( \left\{ \exists i, \theta_{0,i} = 0, \theta_i^2 > \frac{\delta^2}{d} \right\} \right) \right] + d \log(1-p) \\ &\geq \sum_{i: \theta_{0,i} \neq 0} \log \pi \left( \left\{ (\theta_i - \theta_{0,i})^2 \leq \frac{\delta^2}{d} \right\} \right) \\ &\quad + \log \left[ 1 - \sum_{i: \theta_i = 0} \pi_0 \left( \left\{ \theta_i^2 > \frac{\delta^2}{d} \right\} \right) \right] + d \log(1-p). \end{aligned}$$

Assume first that  $i$  is such that  $\theta_{0,i} = 0$ . Then:

$$\begin{aligned} \pi_0 \left( \left\{ \theta_i^2 > \frac{\delta^2}{d} \right\} \right) &= \pi_0 \left( \left\{ \left| \frac{\theta_i}{\sqrt{v_0}} \right| > \frac{\delta}{\sqrt{v_0 d}} \right\} \right) \\ &\leq \exp \left( -\frac{\delta^2}{2v_0 d} \right), \end{aligned}$$

and so

$$\sum_{i: \theta_{0,i} = 0} \pi_0 \left( \left\{ \theta_i^2 > \frac{\delta^2}{d} \right\} \right) \leq d \exp \left( -\frac{\delta^2}{2v_0 d} \right) \leq \frac{1}{2}$$

as soon as  $v_0 \leq \delta^2/(2d \log(d))$ . Then, assume that  $i$  is such that  $\theta_{0,i} \neq 0$ . Now assume that  $\theta_{0,i} > 0$  (the proof is exactly symmetric if  $\theta_{0,i} < 0$ ):

$$\begin{aligned}
\pi \left( \left\{ \theta : (\theta_i - \theta_{0,i})^2 \leq \frac{\delta^2}{d} \right\} \right) &\geq p \int_{\frac{\theta_{0,i}}{\sqrt{v_1}} - \frac{\delta}{\sqrt{v_1 d}}}^{\frac{\theta_{0,i}}{\sqrt{v_1}} + \frac{\delta}{\sqrt{v_1 d}}} \varphi_{(0,1)}(x) dx \\
&\geq \frac{p\delta}{2\sqrt{v_1 d}} \varphi \left( \frac{\theta_{0,i}}{\sqrt{v_1}} + \frac{\delta}{\sqrt{v_1 d}} \right) \\
&\geq \frac{p\delta}{2\sqrt{v_1 d}} \varphi \left( \frac{1}{\sqrt{v_1}} + \frac{\delta}{\sqrt{v_1 d}} \right) \\
&= \frac{p\delta}{2\sqrt{2\pi v_1 d}} \exp \left[ -\frac{1}{2} \left( \frac{1}{\sqrt{v_1}} + \frac{\delta}{\sqrt{v_1 d}} \right)^2 \right] \\
&\geq \frac{p\delta}{2\sqrt{2\pi v_1 d}} \exp \left[ -\frac{1}{v_1} - \frac{\delta^2}{v_1 d} \right].
\end{aligned}$$

Putting everything together:

$$\begin{aligned}
\mathcal{K}(\rho_{\theta_0, \delta}, \pi) &\leq -\|\theta_0\|_0 \log \left( \frac{p\delta}{2\sqrt{2\pi v_1 d}} \exp \left[ -\frac{1}{v_1} - \frac{\delta^2}{v_1 d} \right] \right) + \log(2) + d \log \frac{1}{1-p} \\
&= \|\theta_0\|_0 \left[ \log \left( \frac{2\sqrt{2\pi v_1 d}}{p\delta} \right) + \frac{1}{v_1} + \frac{\delta^2}{v_1 d} \right] + \log(2) + d \log \frac{1}{1-p}.
\end{aligned}$$

So, we have:

$$\begin{aligned}
\int R(\theta) \pi_\gamma(d\theta|\mathcal{D}) - \bar{R} &\leq 2 \inf_{\theta_{0,\delta}} \left\{ R(\theta_0) - \bar{R} + 2c\delta \right. \\
&\quad \left. + 16C \frac{\|\theta_0\|_0 \left[ \log \left( \frac{2\sqrt{2\pi v_1 d}}{p\delta} \right) + \frac{1}{v_1} + \frac{\delta^2}{v_1 d} \right] + \log(2) + d \log \frac{1}{1-p} + \log \left( \frac{4}{\varepsilon} \right)}{(n-1)} \right\}
\end{aligned}$$

□

### 3 Practical implementation of the PAC-Bayesian approach

#### 3.2 Sequential Monte Carlo

The resampling scheme we use in our SMC sampler is systematic resampling, see Algorithm 1.

---

##### Algorithm 1 Systematic resampling

---

**Input:** Normalised weights  $W_t^j := w_t(\theta_{t-1}^j) / \sum_{i=1}^N w_t(\theta_{t-1}^i)$ .

**Output:** indices  $A^i \in \{1, \dots, N\}$ , for  $i = 1, \dots, N$ .

**a.** Sample  $U \sim \mathcal{U}([0, 1])$ .

**b.** Compute cumulative weights as  $C^n = \sum_{m=1}^n N W^m$ .

**c.** Set  $s \leftarrow U$ ,  $m \leftarrow 1$ .

**d. For**  $n = 1 : N$

**While**  $C^m < s$  **do**  $m \leftarrow m + 1$ .

$A^n \leftarrow m$ , and  $s \leftarrow s + C^m$ .

**End For**

---

To move the particles while leaving invariant the current target  $\pi_{\xi, \gamma}(\theta|\mathcal{D})$ , we use the standard random walk Metropolis strategy, but scaled to the current set of particles, as outlined by Algorithm 2.

---

**Algorithm 2** Gaussian random walk Metropolis step

---

**Input:**  $\theta, S$  ( $d \times d$  positive matrix)**Output:**  $\theta_{\text{next}}$ **a.** Sample  $\theta_{\text{prop}} \sim \mathcal{N}(\theta, S)$ .**b.** Sample  $U \sim \mathcal{U}([0, 1])$ .**c.** If  $\log(U) \leq \log \pi_{\xi, \gamma}(\theta_{\text{prop}} | \mathcal{D}) / \pi_{\xi, \gamma}(\theta | \mathcal{D})$ , set  $\theta_{\text{next}} \leftarrow \theta_{\text{prop}}$ , otherwise set  $\theta_{\text{next}} \leftarrow \theta$ .

---

### 3.3 Expectation-Propagation (Gaussian prior)

EP aims at approximating posterior distributions of the form,

$$\pi(\theta | \mathcal{D}) = \frac{1}{Z_\pi} P_0(\theta) \prod_{i=1}^n t_i(\theta)$$

by approximating each site  $t_i(\theta)$  by a distribution from an exponential family  $q_i(\theta)$ . The algorithm cycles through each site, computes the cavity distribution  $Q^{\setminus i}(\theta) \propto Q(\theta) q_i^{-1}(\theta)$  and minimizes the Kullback-Leibler divergence between  $Q^{\setminus i}(\theta) t_i(\theta)$  and the global approximation  $Q(\theta)$ . This is efficiently done by using properties of the exponential family (e.g. Bishop [2006]).

In the Gaussian case the EP approximation can be written as a product of some prior and a product of sites:

$$Q(\theta) \propto \mathcal{N}(\theta; 0, \Sigma) \prod_{i,j} q_{ij}(\theta),$$

for which the sites are unnormalized Gaussians for the natural parametrization  $q_{ij}(\theta) \propto \exp(-\frac{1}{2} \theta^T Q_{ij} \theta + \theta r_{ij})$ . We can equivalently use the one dimensional representation  $q_{ij}(s_{ij}) \propto \exp(-\frac{1}{2} s_{ij}^2 K_{ij} + s_{ij} h_{ij})$ , going from one to the other is easily done by multiplying  $\theta$  by  $(e_i - e_j)X$  where  $\forall i \in \{1, \dots, n\}$ ,  $e_i$  is a vector of zeroes with one on the  $i$ -th line. Hence we keep in memory only  $(K_{ij})_{ij}$  and  $(h_{ij})_{ij}$ .

While computing the cavity moment we must compute  $(Q - (X_i - X_j)(X_i - X_j)K_{ij})$  and its inverse. The latter can be computed efficiently using Woodbury formula. Equivalently one could use similar tricks where only the Cholesky factorisation is saved and updated as in Seeger [2005]. By precomputing some matrix multiplication the later cavity moment computation can be done in complexity  $\mathcal{O}(p^2)$ .

To update the sites we compute normalizing constant  $Z_{ij} = \int \mathcal{N}(s; m^{\setminus ij}, \sigma^{\setminus ij}) t_{ij}(s) ds$  and use properties of exponential families.

---

**Algorithm 3** parallel EP for Gaussian Prior

---

**Input:**  $\vartheta, \gamma$ **Output:**  $m$  and  $V$ **Init:**  $V \leftarrow \Sigma, m \leftarrow 0$ **Untill Convergence Do****For** all sites  $(i, j)$  **Do** in parallel

- Compute the cavity moments  $m^{\setminus ij}, V^{\setminus ij}$
- Compute the 1st and 2nd order moments of  $q^{\setminus ij}(s_{ij}) t_{ij}(s_{ij})$
- Update  $K_{ij}$  and  $h_{ij}$

**End For**Update  $V = (\Sigma^{-1} + \sum_{i,j} (X_i - X_j)^T (X_i - X_j) K_{ij})^{-1}, m = V(\sum_{i,j} (X_i - X_j) h_{ij})$ **End While**

---



**Normalising Constant** The normalizing constant of the posterior can be computed using EP. We have that for each sites  $t_{ij}(\theta) = C_{ij}q_{ij}(\theta)$  we replace those sites in integral we wish to approximate,

$$\int \mathcal{N}(\theta; 0, \Sigma) \prod_{ij} t_{ij}(\theta) d\theta \simeq \prod_{ij} C_{ij} \int \mathcal{N}(\theta; 0, \Sigma) \prod_{ij} q_{ij}(\theta) d\theta$$

The integral on the right hand side is a Gaussian convolution and is therefore also Gaussian. The  $C_{ij}$ s can be approximated by matching the zeroth order moment in the site update. As noted in the paper we can also compute the derivatives with respect to some prior hyper-parameter (see Seeger [2005]).

### 3.4 Expectation-Propagation (spike and slab prior)

The posterior can be written as

$$\pi(\theta|\mathcal{D}) \propto \prod_{i,j} t_{ij}(\theta) \prod_{k=1}^d t_k(\theta_k, z_k) \mathcal{Ber}(z_k; p),$$

where  $z_k \in \{0, 1\}$  codes the origin of  $\theta_k$ , spike/slab, and where  $t_k(\theta_k, z_k) \propto z_k \mathcal{N}(\theta_k; 0, v_0) + (1 - z_k) \mathcal{N}(\theta_k; 0, v_1)$ . The approximation given by EP is of the form,

$$Q(\theta, z) \propto \prod_{i,j} q_{ij}(\theta) \prod_{k=1}^d q_k(\theta_k, z_k) \mathcal{Ber}(z_k; p_k),$$

where  $q_k(\theta_k, z_k) \propto \mathcal{Ber}(z_k, p_k) \mathcal{N}(\theta_k; m_k, \sigma_k^2)$ , and  $t_{ij}(\theta)$  is as in the previous section. The cavity moments are easy to compute as the approximation is Gaussian in  $\theta$  and Bernoulli in  $z$ . In both cases we can deduce cavity moments because division is stable inside those classes of functions. We get some distribution  $Q^{\setminus k}(\theta_k) \propto \mathcal{Ber}(z_k; p^{\setminus k}) \mathcal{N}(\theta_k; m^{\setminus k}, \sigma^{2, \setminus k})$ . We can compute the normalizing constant of the distribution  $Q^{\setminus ij}(\theta) t_k(\theta_k, z_k)$ , namely,

$$Z_k = p^{\setminus k} \int \mathcal{N}(\theta_k; 0, v_0) \mathcal{N}(\theta_k; m^{\setminus k}, \sigma^{2, \setminus k}) d\theta_k + (1 - p^{\setminus k}) \int \mathcal{N}(\theta_k; 0, v_0) \mathcal{N}(\theta_k; m^{\setminus k}, \sigma^{2, \setminus k}) d\theta_k$$

Where we can find the update by computing the derivatives of  $\log Z_k$  with respect to  $p^{\setminus k}$ ,  $m^{\setminus k}$  and  $\sigma^{2, \setminus k}$

Initialization for the Gaussian is done to a given  $\Sigma_0$  that will be subtracted later on. The initial  $p_k$ s are taken such that the approximation equals the prior  $p$  at the first iteration.

## 5 Numerical illustration

Figure 1 shows the posterior marginals as given by EP and tempering SMC. The later is exact in the sense that the only error stems from Monte Carlo; we see that the mode is well approximated however the variance is slightly underestimated.

In Table 1 we show the CPU times in seconds, on all dataset studied. Experiments were run with a i7-3720QM CPU @ 2.60GHz intel processor with 6144 KB cache. Our linear model is overall faster on those datasets. A caveat is that Rankboost is implemented in Matlab, while our implementation is in C.

## References

- C. M. Bishop. *Pattern Recognition and Machine Learning*, chapter 10. Springer, 2006.
- O. Catoni. *PAC-Bayesian Supervised Classification*, volume 56. IMS Lecture Notes & Monograph Series, 2007.
- W. Hoeffding. Probability Inequalities for Sums of Random Variables. *Annals of Mathematical Statistics*, 10:293–325, 1948.
- P. Massart. *Concentration Inequalities and Model Selection*, volume 1896. Springer Lecture Notes in Mathematics, 2007.
- M. Seeger. Expectation propagation for exponential families. Technical report, U. of California, 2005.

Figure 1: Comparison of the output of the two algorithms

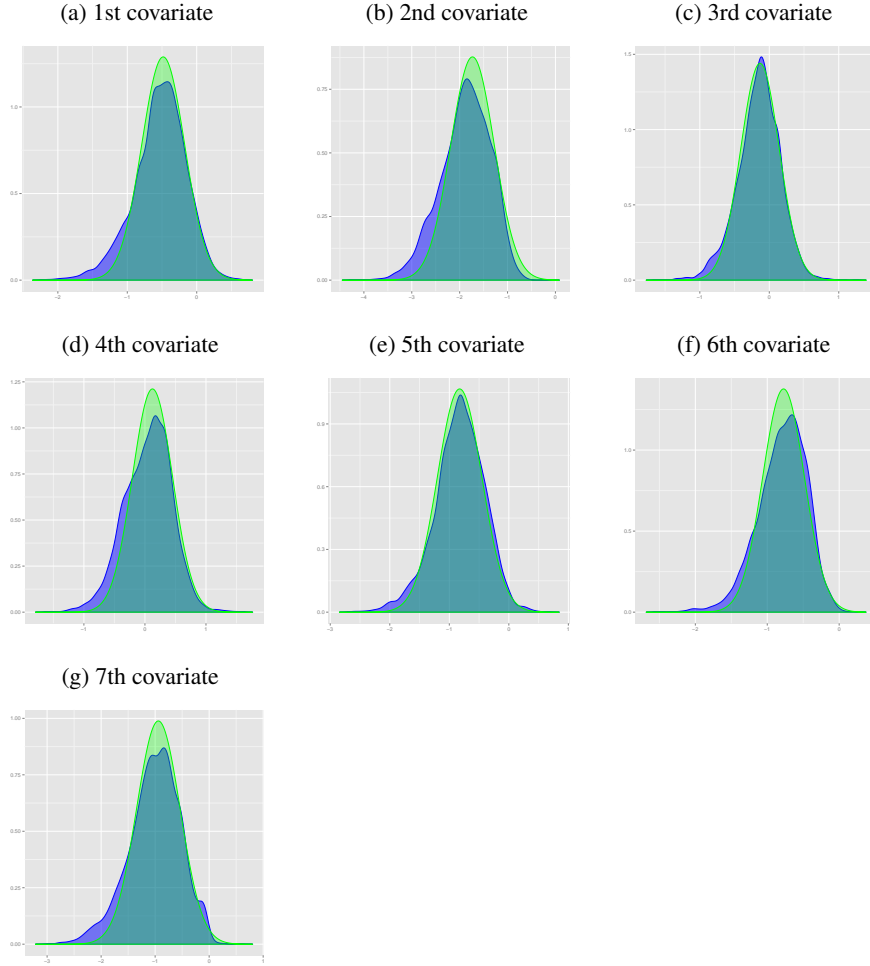

Comparison of the Gaussian approximation obtained by Fractional EP (green) with the true density generated by SMC (blue) on the Pima indians dataset

| Dataset | Covariates | Balance | EP-AUC       | GPEP-AUC     | Rankboost |
|---------|------------|---------|--------------|--------------|-----------|
| Pima    | 7          | 34%     | <b>0.06</b>  | 7.75         | 3.26      |
| Credit  | 60         | 28%     | <b>1.98</b>  | 7.59         | 56.54     |
| DNA     | 180        | 22%     | <b>11.26</b> | 63.47        | 141.60    |
| SPECTF  | 22         | 50%     | <b>0.25</b>  | 63.47        | 3.55      |
| Colon   | 2000       | 40%     | 636.63       | <b>60.99</b> | 156.85    |
| Glass   | 10         | 1%      | <b>0.23</b>  | 1.33         | 2.36      |

Table 1: Computation times in seconds
